# Supplementary material for: Prognostic and Predictive Impact of Circulating Tumor DNA in Patients with Advanced Cancers Treated with Immune Checkpoint Blockade
Source: Oxford University Press journal article supplement (doi:10.1158/2159-8290.cd-20-0047), 2020-08-14
Supplement: 21598290cd200047-sup-tables3.docx [file 21598290cd200047-sup-tables3.docx]

**Supplementary Table 3.** Demographics and baseline disease characteristics for patients with paired samples and the subset with initial radiologic SD

|  |  | Patients with paired samples | Patients with initial SD |
| --- | --- | --- | --- |
| N |  | 171 | 74 |
| Age | Mean (SD) | 62.6 (9.8) | 63.1 (10.9) |
|  | Range | 23-87 | 23-87 |
|  | Median (IQR) | 63 (57-69) | 64 (57-71) |
| Gender, n (%) | Female | 67 (39) | 24 (32) |
|  | Male | 104 (61) | 50 (68) |
| Race, n (%) | White | 119 (70) | 49 (66) |
|  | Asian | 45 (26) | 21 (28) |
|  | African American | 2 (1) | 1 (1) |
|  | Other | 5 (3) | 3 (4) |
| Prior lines of therapy, n (%) | 0 | 17 (10) | 8 (11) |
|  | 1 | 41 (24) | 14 (19) |
|  | 2 | 31 (18) | 14 (19) |
|  | 3 | 40 (23) | 15 (20) |
|  | 4+ | 39 (23) | 21 (28) |
| Smoking history, n (%) | Never smoker | 31 (18) | 13 (18) |
|  | Current/former smoker | 104 (61) | 51 (69) |
|  | Unknown | 36 (21) | 10 (14) |
| Tumor type, n (%) | NSCLC | 102 (60) | 48 (65) |
|  | UC | 46 (27) | 16 (22) |
|  | Other | 23 (13) | 10 (14) |
| Tumor stage, n (%) | III | 19 (11) | 8 (11) |
|  | IV | 140 (82) | 60 (81) |
|  | Other | 12 (7) | 5 (7) |
| ECOG/WHO PS, n (%) | 0 | 59 (35) | 26 (35) |
|  | 1 | 111 (65) | 47 (64) |
|  | Other | 1 (1) | 1 (1) |
| Tumoral PD-L1 expression, n (%) | <25% | 47 (27) | 16 (22) |
|  | ≥25% | 103 (60) | 47 (64) |
|  | Unknown | 21 (12) | 11 (15) |
| Liver metastasis, n (%) |  | 32 (19) | 9 (12) |

ECOG, Eastern Cooperative Oncology Group; NSCLC, non-small cell lung cancer; PS, performance status; UC, urothelial carcinoma; WHO, World Health Organization
